# Supplementary material for: Anthocyanin production as a potential visual selection marker during plant transformation
Source: PubMed Central journal article supplement — Transgenic Res. 2011 Feb 22;20(6):1253–64. doi: 10.1007/s11248-011-9490-1 (PMC3210953; doi:10.1007/s11248-011-9490-1), 2011-02-22

Strawberry, kanamycin selected

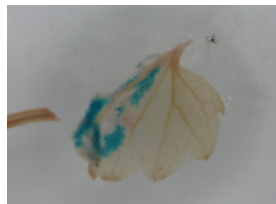

Apple, kanamycin selected

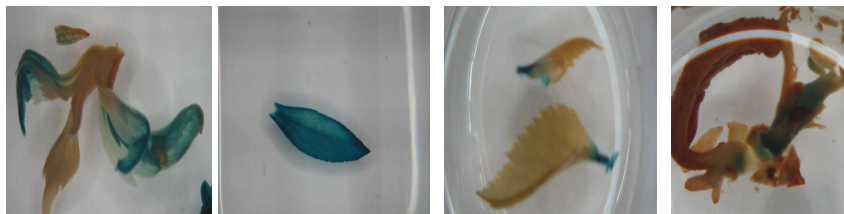

Apple, not selected

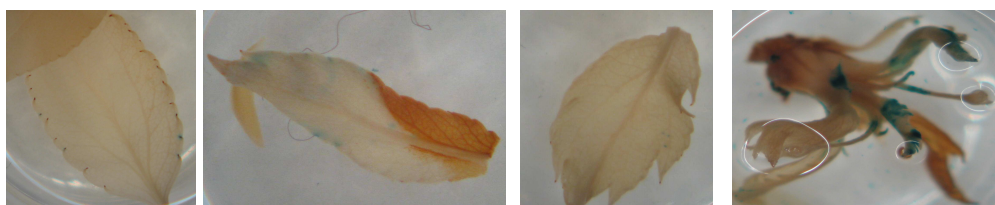

Potato, kanamycin selected

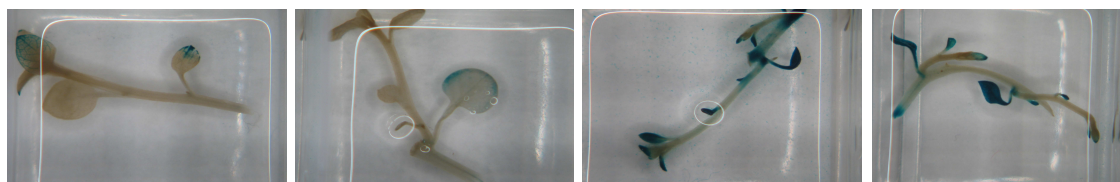

Potato, not selected

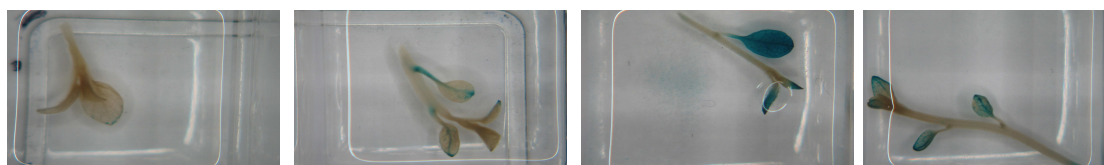

Supplement: 11248_2011_9490_MOESM3_ESM.pdf [file 11248_2011_9490_MOESM3_ESM.pdf]
