# Supplementary figures and images for: Anthocyanin production as a potential visual selection marker during plant transformation
Source: PubMed Central journal article supplement — Transgenic Res. 2011 Feb 22;20(6):1253–64. doi: 10.1007/s11248-011-9490-1 (PMC3210953; doi:10.1007/s11248-011-9490-1), 2011-02-22

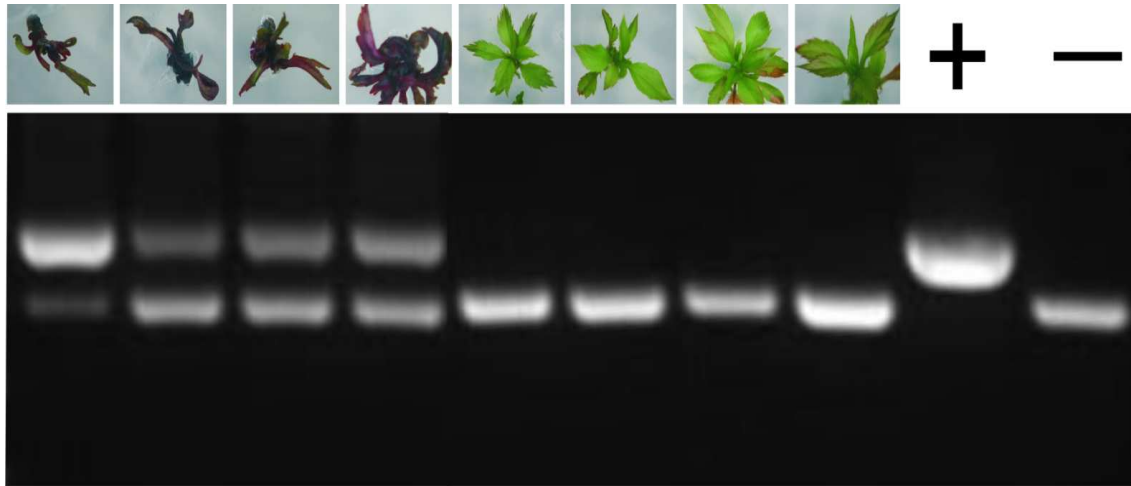

| Phenotype        | PCR+ for <i>MYB10</i> | PCR- for <i>MYB10</i> |
|------------------|-----------------------|-----------------------|
| red shoots ( 9)  | 9                     | none                  |
| green shoot (20) | 11                    | 9                     |

Supplement: 11248_2011_9490_MOESM1_ESM.pdf [file 11248_2011_9490_MOESM1_ESM.pdf]

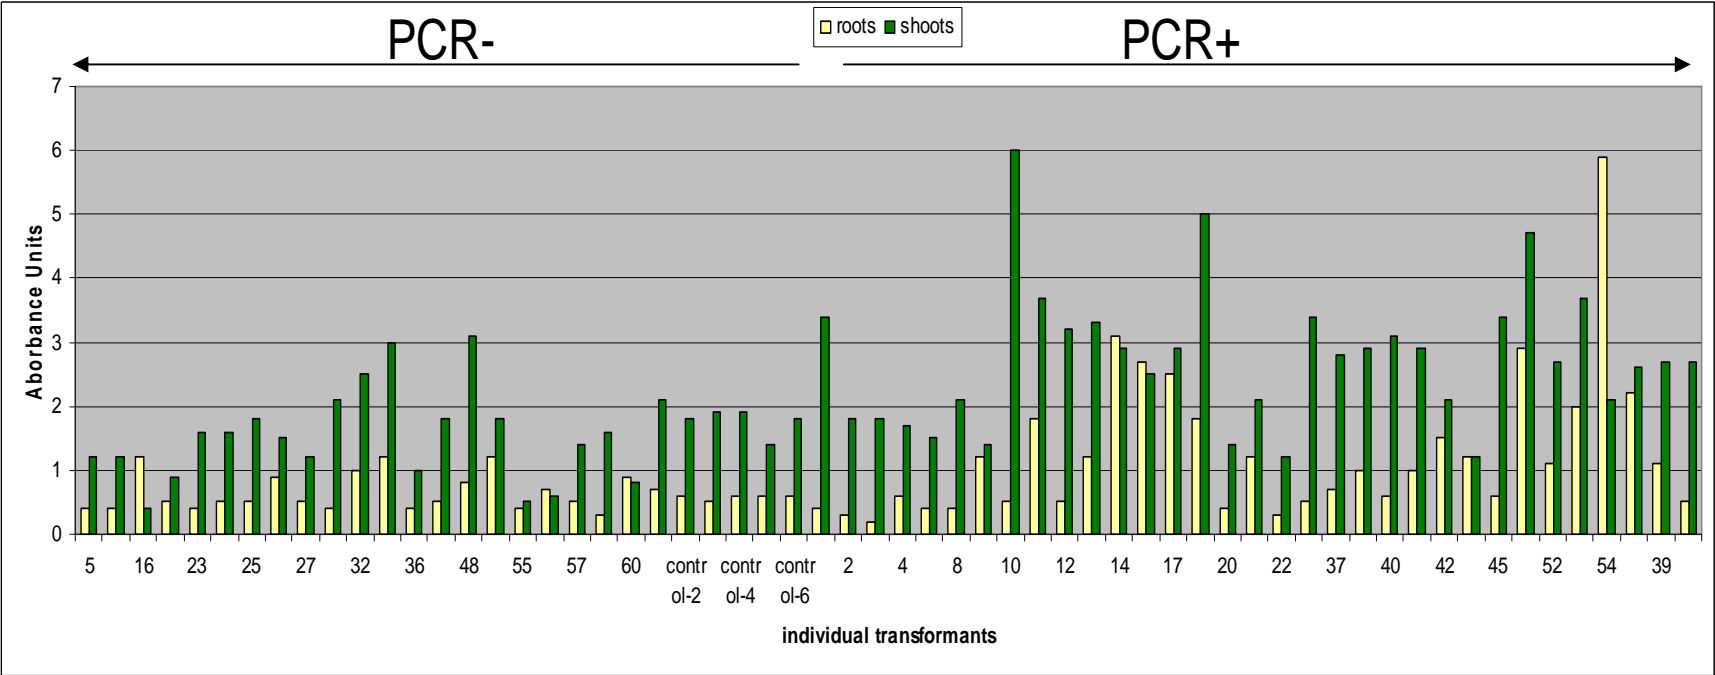

Supplement: 11248_2011_9490_MOESM2_ESM.pdf [file 11248_2011_9490_MOESM2_ESM.pdf]
